# Supplementary material
Source: Elsevier journal article supplement (https://www.sciencedirect.com/science/article/pii/S1138359318303290)
Supplement: mmc1 [file S1138359318303290:mmc1.docx]

**Apéndice A.**

**Autores grupos de Contraste y Director para la Integración en la GASBI.**

**Grupo de Contraste**: José Álvarez González, Gloria Armento Álvarez, Alberto Bahamonde Carrasco, María Jesús Barrenechea Fernández, Consuelo Blanco Carrera, María Borao Cengotita-Bengoa, Almudena Castro Bayón, Juan Manuel Clemen Marco, Claudio Alberto Fabián Mora, Ana Cristina Fernández Álvarez, Ramona Fernández Nieto, Benigno Fernández Sánchez, María Ángeles García Villafañe, María Estrella Gómez García, Diana González Arce, Raquel González Gago, Olga González López, María Isabel González Vázquez, Mª Carmen Hernández Martínez, Juan Carlos Hernando García, Emilio López Álvarez, Mª Del Pilar Marqués Sánchez, Manuel Martín Fernández, Nicolás Martín Navarro, Ana Lucía Martínez Jiménez, Ambrosio Martínez Melcón, Xose Manuel Meijome Sánchez, Elías Moldes Félix, Mª Teresa Montenegro Gaite, Alejandra Morillo Mateos, Rafael Muedra Font, Manuel Piay Guiance, Mercedes Pardo Pacios, Mª Victoria Parra Soto, José María Pelayo Terán, Teresa Pérez Fernández, Mª Jesús Posadas Frutos, Rosa María Ramón Rodríguez, Carmen Raya Fernández, Mª Luz Rodríguez Álvarez, María Del Mar Rodríguez Fresnillo, Miriam Rodríguez María, Mónica Vázquez López, Inmaculada Vicente Ballesteros, Luis Rubio Villasol, Ana Isabel Sánchez González, José Alberto Voces Gómez, Mª Esther Yagüe Zapatero, Yolanda Zapico Merayo

**Grupo Director**: Sara Alonso Rodríguez, Olga Álvarez Robles, Trinidad García Álvarez, José Macía Losada, María Jesús Martínez Martínez, Félix José De Los Mozos Vázquez, Alberto Pérez Morán, Olegario Posadilla González, María Angustias Pumar Martínez, Jesús Rodríguez Calleja, José Luis Rodríguez Soto, José Antonio Visedo López

**Apéndice B**

**Encuesta sobre la percepción que los profesionales hacen de la integración. Cuestionario de Nuño-Solinís R y cols basado en el estudio D’Amour**

| 1 | **OBJETIVOS COMUNES** | **1** | **2** | **3** | **4** | **5** |
| --- | --- | --- | --- | --- | --- | --- |
| La existencia de objetivos comunes explícitos facilita la colaboración y coordinación entre Atención Primaria y el Hospital. | No hay objetivos comunes | Existen algunos objetivos comunes, pero muy pocos | Existen algunos objetivos comunes | Existen bastantes objetivos comunes | Hay objetivos comunes y consensuados que abarcan de todos los aspectos asistenciales |
| 2 | **ORIENTACIÓN AL PACIENTE** | **1** | **2** | **3** | **4** | **5** |
| Tener en cuenta los intereses y preferencias de los pacientes favorece la colaboración y coordinación entre Atención Primaria y el Hospital. | No se tienen en cuenta los intereses y preferencias de los pacientes en las relaciones entre niveles | Los intereses y preferencias de los pacientes se tienen poco en cuenta en las relaciones entre niveles | Los intereses y preferencias de los pacientes se tienen en cuenta a veces en las relaciones entre niveles | Los intereses y preferencias de los pacientes se tienen en cuenta a menudo en las relaciones entre niveles | Siempre se tienen en cuenta los intereses y preferencias de los pacientes en las relaciones entre niveles |
| 3 | **CONOCIMIENTO MUTUO** | **1** | **2** | **3** | **4** | **5** |
| El conocimiento profesional mutuo acerca del enfoque asistencial, de los valores y las competencias específicas, así como del medio en el que cada profesional desarrolla su trabajo influye a la hora de poder desarrollar un espíritu de equipo y un trabajo colaborativo. El conocimiento personal también resulta de ayuda. | Desconozco el otro nivel asistencial | Tengo escaso conocimiento del otro nivel asistencial | Tengo algún conocimiento del otro nivel asistencial | Tengo un buen conocimiento del otro nivel asistencial | Tengo un conocimiento excelente del otro nivel asistencial |
| 4 | **CONFIANZA** | **1** | **2** | **3** | **4** | **5** |
| La confianza mutua permite la colaboración interprofesional, reduce la incertidumbre y contribuye a la generación de redes de profesionales multidisciplinares orientadas a las necesidades del paciente. | No tengo confianza con el otro nivel asistencial | Mi nivel de confianza con el otro nivel asistencial es bajo | Mi nivel de confianza con el otro nivel asistencial es medio | Mi nivel de confianza con el otro nivel asistencial es alto | Mi nivel de confianza con el otro nivel asistencial es muy alto |
| 5 | **ESTRATEGIA** | **1** | **2** | **3** | **4** | **5** |
| En el ámbito de la coordinación y colaboración entre profesionales de uno y otro nivel influye el que desde la Autoridad Sanitaria correspondiente se transmitan directrices que fomenten el trabajo colaborativo entre los profesionales de los dos niveles. | No hay directrices orientadas a la colaboración entre niveles | Las directrices orientadas a la colaboración entre niveles son escasas | Hay algunas directrices orientadas a la colaboración entre niveles. | Hay bastantes directrices orientadas a la colaboración entre niveles. | Existe toda una estrategia orientada a la colaboración entre niveles |
| 6 | **LIDERAZGO COMPARTIDO** | **1** | **2** | **3** | **4** | **5** |
| El liderazgo compartido por gestores y clínicos a nivel local permite desarrollar la colaboración interprofesional y entre organizaciones. | No hay un liderazgo compartido | El liderazgo compartido entre ambos niveles es escaso | Hay algunos ámbitos donde existe un liderazgo compartido | Hay bastantes ámbitos donde existe un liderazgo compartido | El liderazgo es definitivamente compartido e impulsa la colaboración en todos los ámbitos. |
| 7 | **APOYO A LA INNOVACIÓN** | **1** | **2** | **3** | **4** | **5** |
| La colaboración supone cambios en la práctica clínica y en el reparto de responsabilidades tanto para los profesionales de Atención Primaria como los de Atención Hospitalaria. Estos cambios implican innovaciones que pueden ser o no apoyadas por tu organización. | El apoyo a la innovación es nulo | Hay poco apoyo a la innovación | Hay algo de apoyo a la innovación | Existe bastante apoyo a la innovación | Existe mucho apoyo a la innovación |
| 8 | **ESPACIOS DE ENCUENTRO** | **1** | **2** | **3** | **4** | **5** |
| Para que los profesionales de AP y hospitalaria puedan colaborar, se necesitan espacios, canales y actuaciones que permitan el contacto, el debate y el establecimiento de vínculos y compromisos entre ellos. | Los profesionales estamos aislados. No hay espacios de encuentro | Los espacios de encuentro son escasos | Hay algunos espacios de encuentro | Hay bastantes espacios de encuentro | Hay muchos espacios de encuentro |
| 9 | **PROTOCOLIZACIÓN** | **1** | **2** | **3** | **4** | **5** |
| La protocolización permite clarificar las responsabilidades de cada profesional y negociar el reparto de dichas responsabilidades. Existen muchos mecanismos para formalizar los acuerdos y pactos entre los profesionales de uno y otro nivel: protocolos, rutas asistenciales, sistemas de información, acuerdos interorganizaciones o entre unidades, etc. | No hay mecanismos para la protocolización | Hay pocos mecanismos para la protocolización | Hay algunos mecanismos para la protocolización | Hay bastantes mecanismos para la protocolización | Existen toda una sistemática de generación de acuerdos y protocolización |
| 10 | **SISTEMA DE INFORMACIÓN** | **1** | **2** | **3** | **4** | **5** |
| El intercambio efectivo de información de calidad entre profesionales es un elemento que facilita la colaboración y permite una mejor atención. | No dispongo de la información relevante procedente del otro nivel | Dispongo de escasa información relevante procedente del otro nivel | Dispongo de alguna información relevante procedente del otro nivel | Dispongo de bastante información relevante procedente del otro nivel | Dispongo de toda la información relevante procedente del otro nivel |

**Apéndice C.**

**Características de la encuesta para priorizar las herramientas de integración desarrollada en la GASBI.**

| Apartados (5)  (subdivisión en áreas: en cursiva) | Número de preguntas | Presencia de respuestas con texto libre. |
| --- | --- | --- |
| 1.Comunicación   - *Informe médico* - *Informe de interconsulta* - *Informe de enfermería* - *Comunicación entre profesionales* | 4  4  2  5 | Sí  Sí  Sí  Sí |
| 2.Trabajo en equipo   - *Conciliación de la medicación* - *Rutas asistenciales* - *Vías Clínicas* - *Protocolos de tratamiento compartido* - *Unidades asistenciales para la integración y coordinadores de los cuidados* - *Educación para la salud.* | 2  2  2  2  6  4 | Sí  Sí  Sí  Sí  Sí  Sí |
| 3. Coordinación   - *Citaciones* - *Especialistas consultores* - *Uso de aplicaciones informáticas* | 4  2  2 | Sí  Sí  Sí |
| 4. Valoración de la encuesta | 3 | Sí |
| 5. Perfil del encuestado | 5 | No |
| Total | 49 |  |

GASBI: Gerencia de Asistencia Sanitaria del Bierzo.
